# Supplementary material for: Telechelic block copolymer L-PPI-b-poly(epoxide-alt-PA) obtained via desulfonation of poly(o-nitrophenylsulfonyl-activated aziridines)
Source: Royal Society of Chemistry journal article supplement (doi:10.1039/d3py00620d), 2023-01-01
Supplement: d3py00620d1.pdf [file d3py00620d1.pdf]

Electronic Supplementary Material (ESI) for Polymer Chemistry.

This journal is © The Royal Society of Chemistry 2023

## Supplementary Information

### **Telechelic Block Copolymers L-PPI-b-Poly(Epoxides-alt-PA) via Desulfonation of Poly(o-Nitrophenylsulfonyl Activated Aziridines)**

Zhuangzhuang Liang<sup>a,b</sup>, Feng Ren<sup>a,b</sup>, Chenyang Hu<sup>a</sup>, Zan Gao<sup>a</sup>, Xuan Pang<sup>a,b\*</sup>, and Xuesi Chen<sup>a,b\*</sup>

<sup>a</sup> Key Laboratory of Polymer Ecomaterials, Changchun Institute of Applied Chemistry, Chinese Academy of Sciences, Changchun 130022, China

<sup>b</sup> School of Applied Chemistry and Engineering, University of Science and Technology of China, Hefei 230026, China

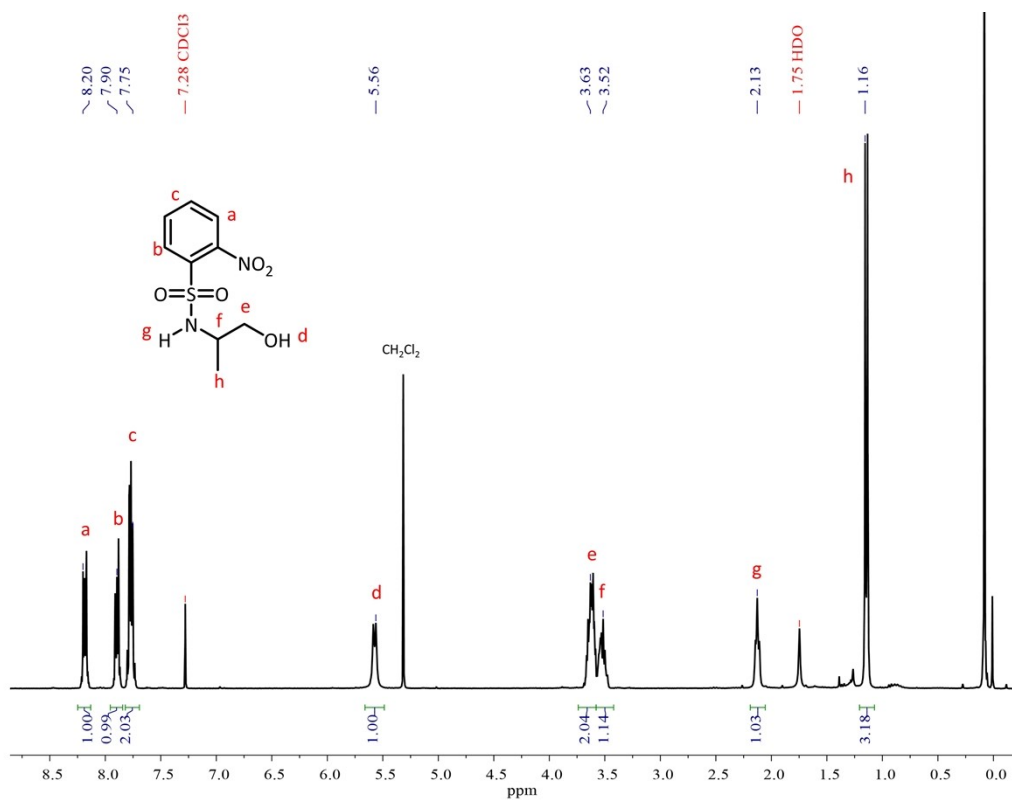

**Figure S1.** <sup>1</sup>H-NMR spectra of initiator N-(2-hydroxy-1-methylethyl)-2-nitrobenzenesulfonamide I (300 MHz, in CDCl<sub>3</sub> at 25 °C).

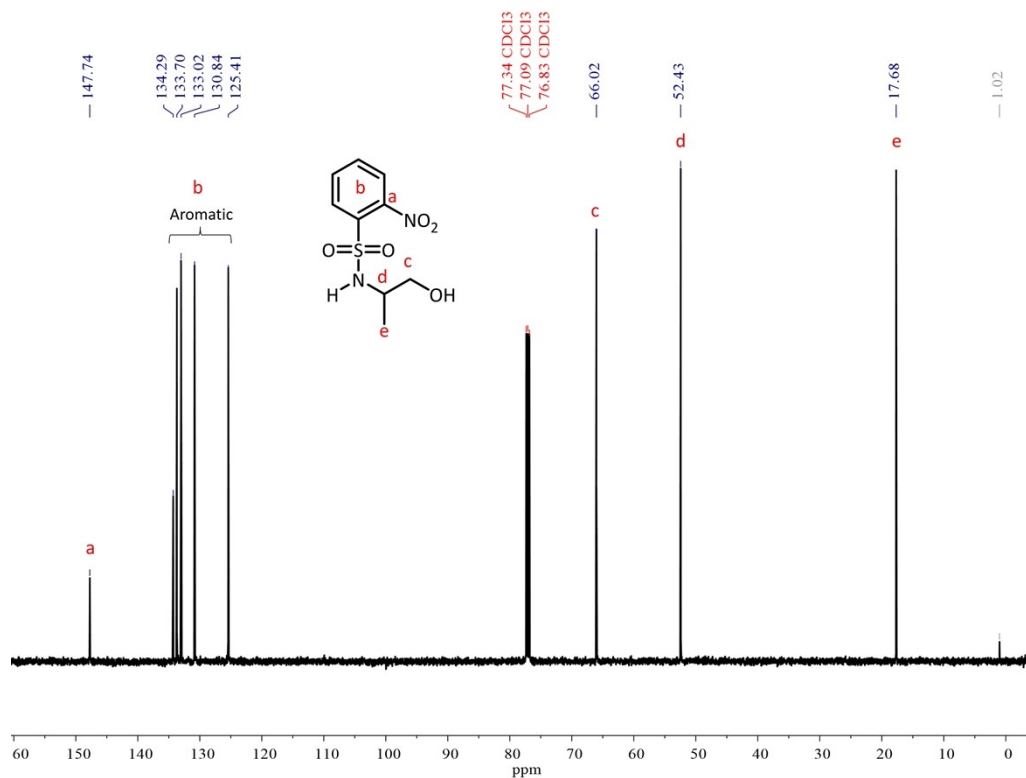

**Figure S2.** <sup>13</sup>C-NMR spectra of initiator N-(2-hydroxy-1-methylethyl)-2-nitrobenzenesulfonamide I (500 MHz, in CDCl<sub>3</sub> at 25 °C).

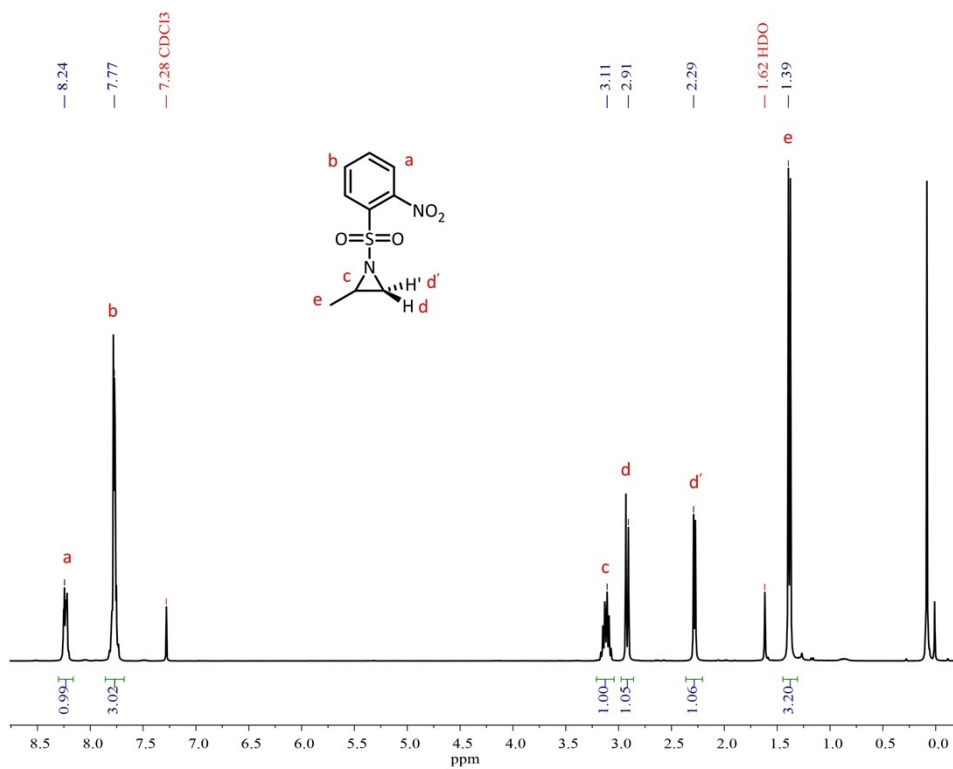

**Figure S3.** <sup>1</sup>H-NMR spectra of 2-methyl-1-(2-nitrophenylsulfonyl) aziridine (**NsMAz**) (300 MHz, in CDCl<sub>3</sub> at 25 °C).

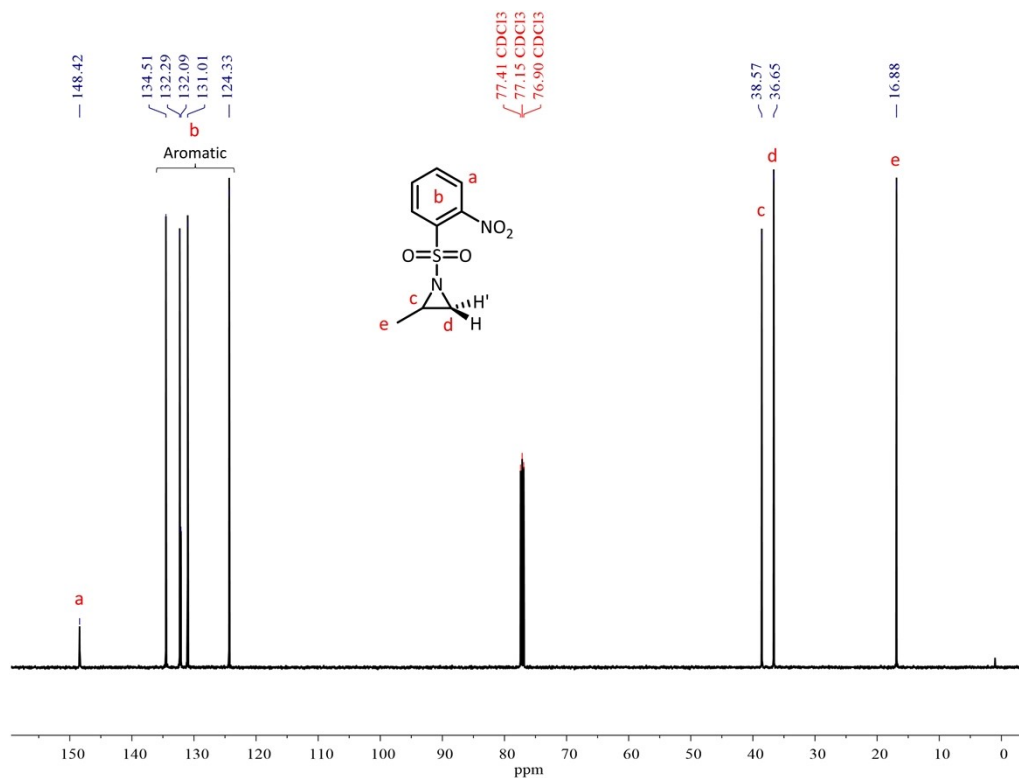

**Figure S4.** <sup>13</sup>C-NMR spectra of 2-methyl-1-(2-nitrophenylsulfonyl) aziridine (**NsMAz**) (500 MHz, in CDCl<sub>3</sub> at 25 °C).

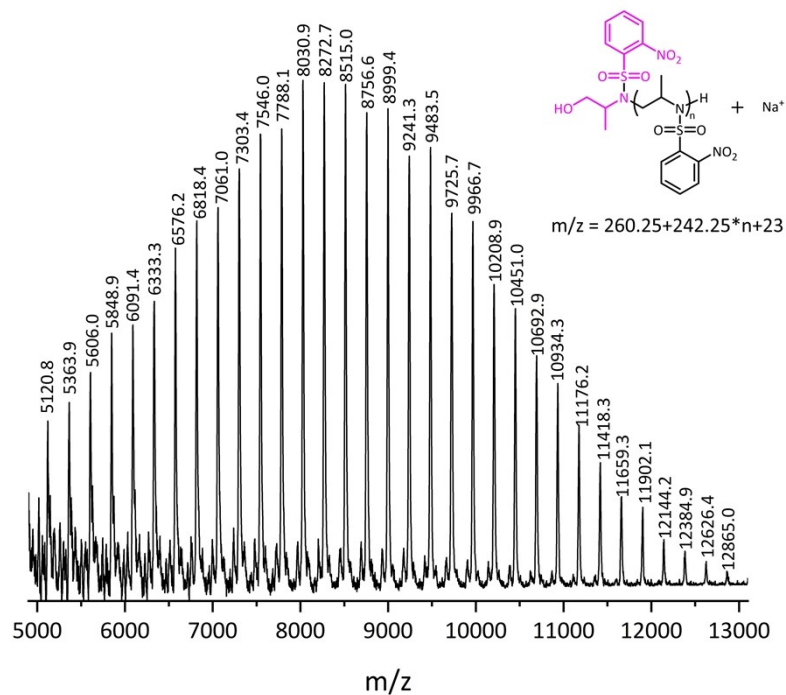

**Figure S5.** Experimental MALDI TOF mass spectrum of PNzMAz-OH (Entry 2, Table 1).

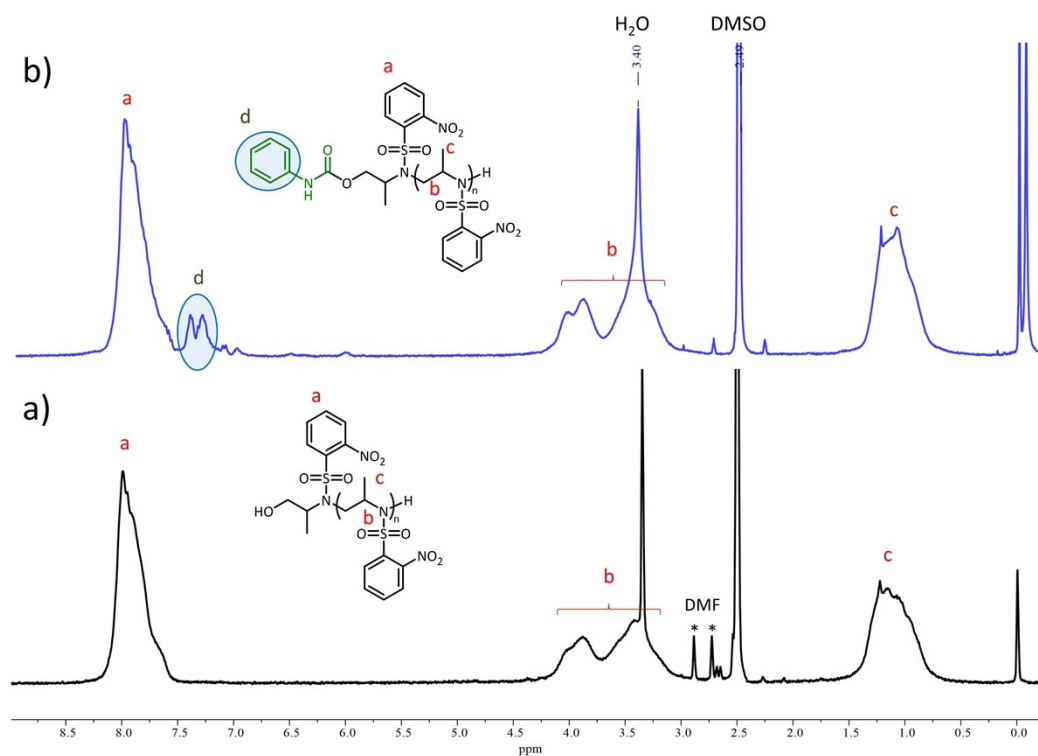

**Figure S6.**  $^1\text{H}$  NMR spectrum of a) PNzMAz-OH (Entry 1, Table 1) and b) its  $\alpha$ -carbamate derivative obtained after postfunctionalization (300 MHz, in  $d^6$ -DMSO at 25  $^\circ\text{C}$ ).

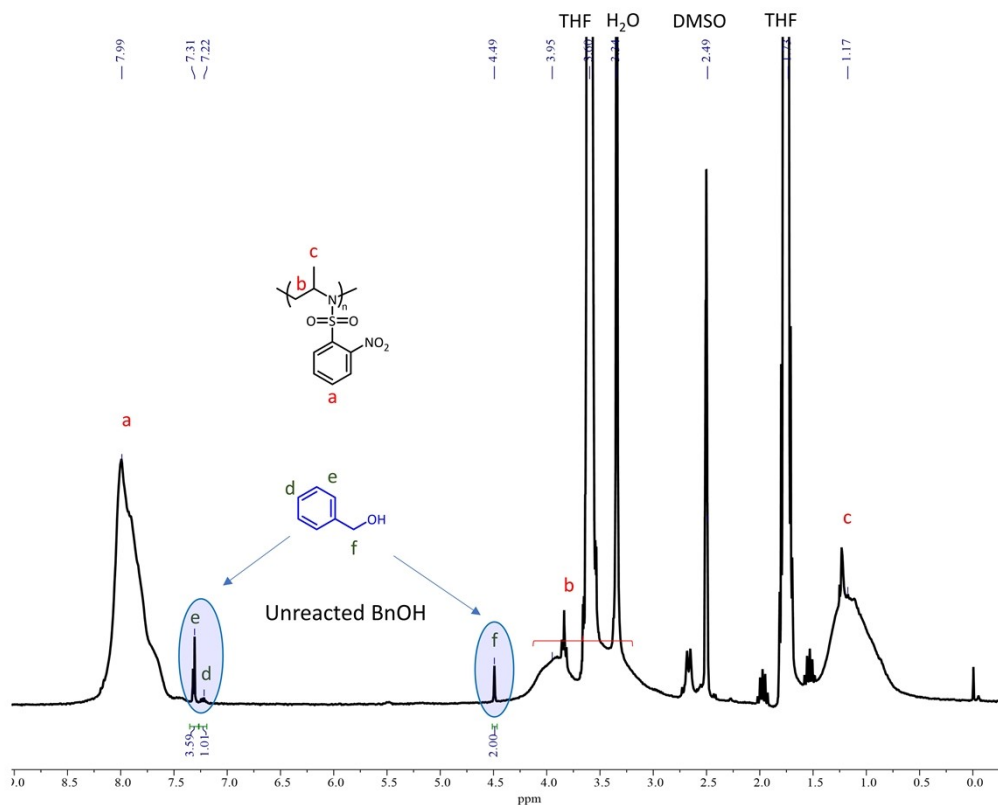

**Figure S7.**  $^1\text{H}$  NMR spectrum of mixture in reaction solution (300 MHz, in  $d^6$ -DMSO at 25 °C, Entry 5, Table 1).

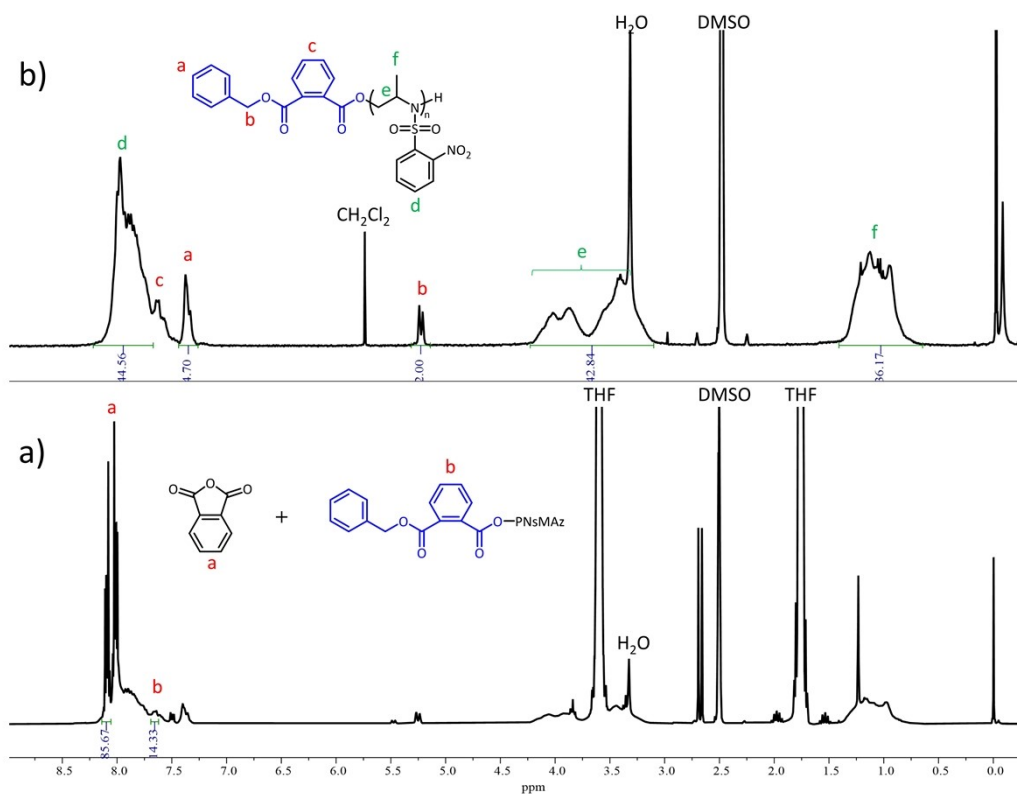

**Figure S8.**  $^1\text{H}$  NMR spectrum of a) mixture in reaction solution using BnOH as initiator and b) final purified PNsMAz (300 MHz, in  $d^6$ -DMSO at 25 °C, Entry 1, Table 2).

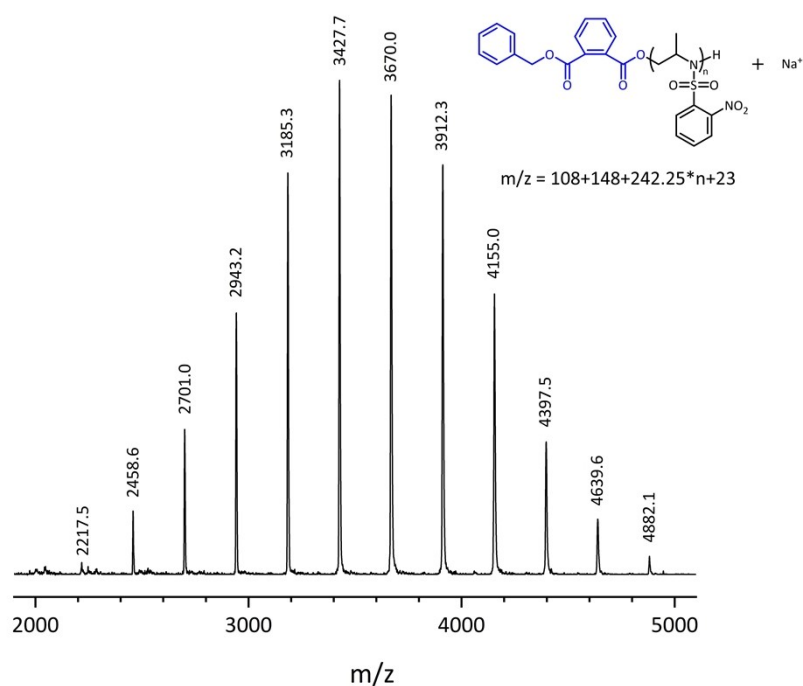

**Figure S9.** Experimental MALDI TOF mass spectrum of PNsMAz initiated by BnOH with a PA (Entry 1, Table 2).

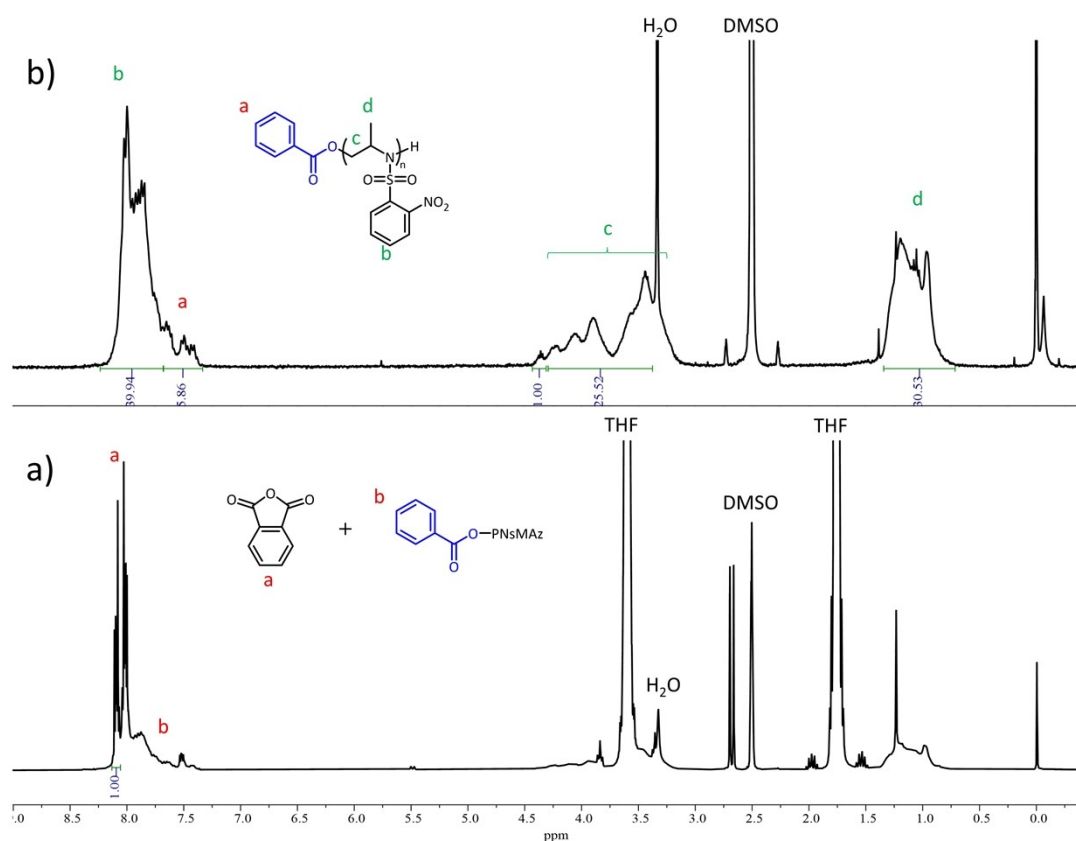

**Figure S10.** <sup>1</sup>H NMR spectrum of a) mixture in reaction solution using BA as initiator and b) final purified PNsMAz (300 MHz, in *d*<sup>6</sup>-DMSO at 25 °C, Entry 2, Table 2).

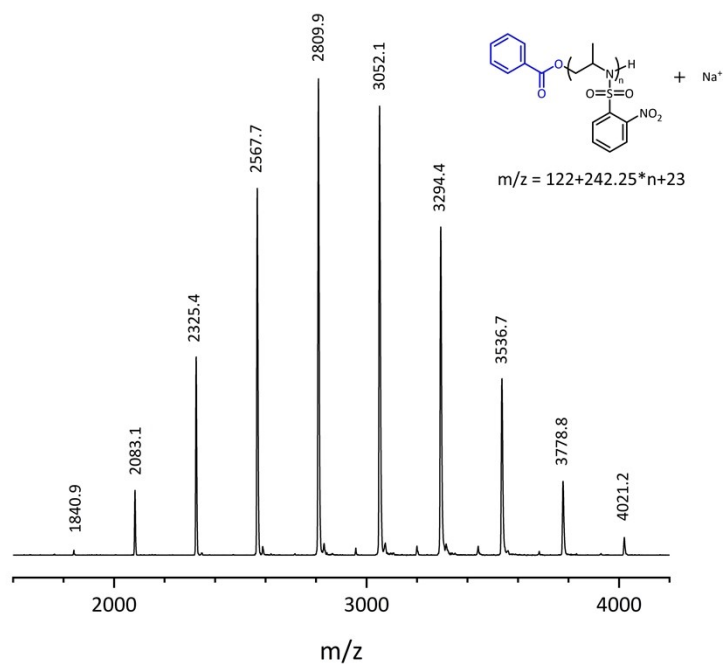

**Figure S11.** Experimental MALDI TOF mass spectrum of PNMAz initiated by BA (Entry 2, Table 2).

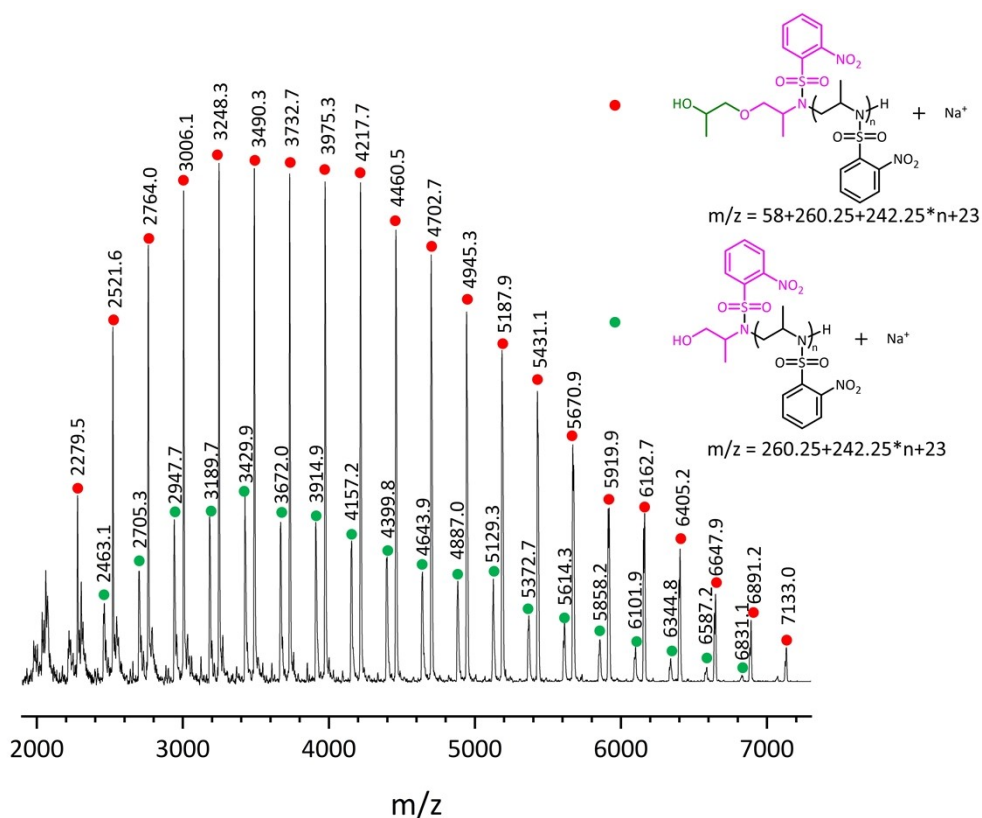

**Figure S12.** Experimental MALDI TOF mass spectrum of PNMAz-OH initiated by initiator I in PO.

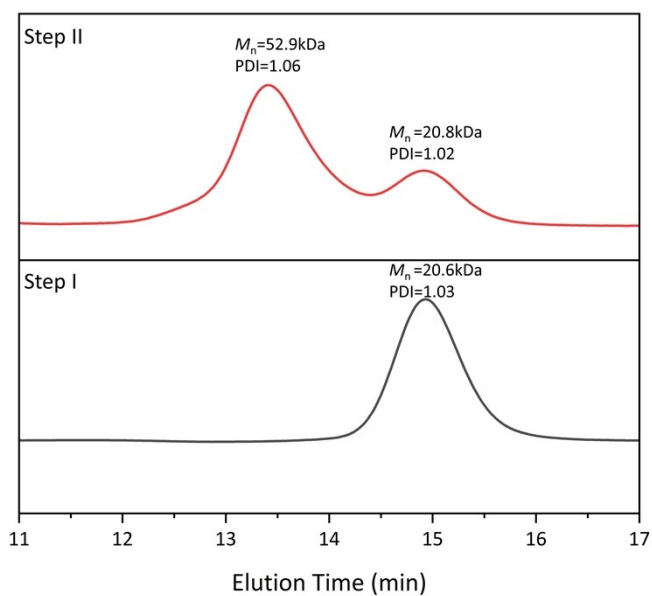

**Figure S13.** SEC traces of “two step in one pot” polymerization of NsMAz and PA in PO by using BA as initiator (Entry 3, Table 2).

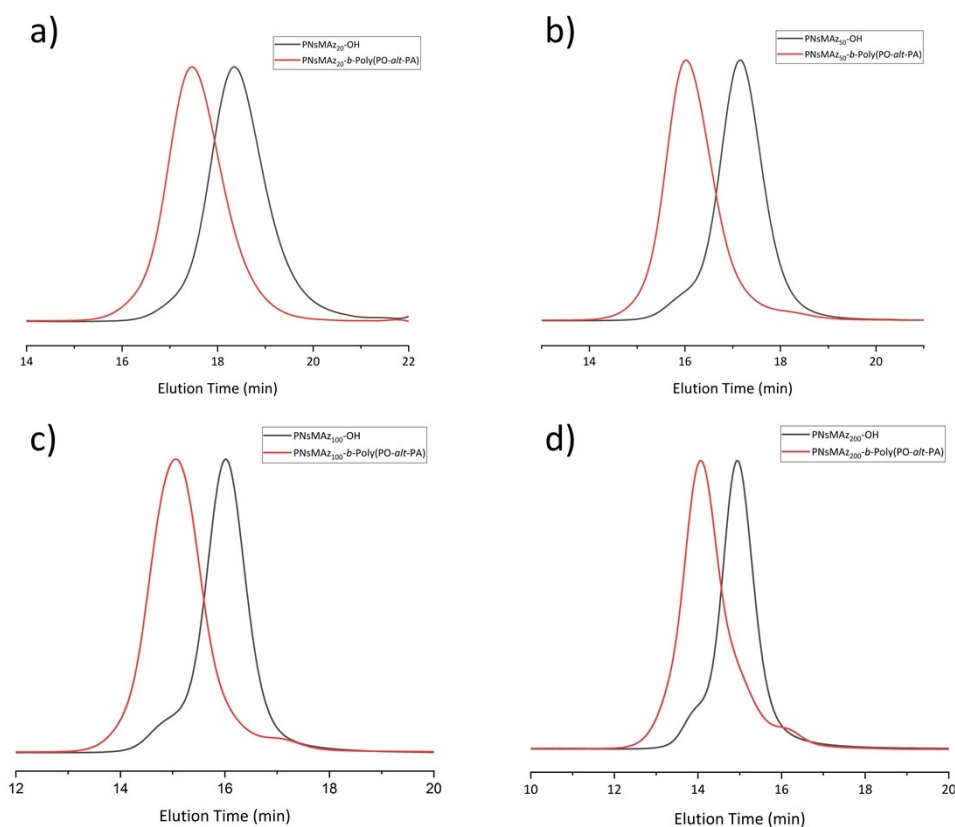

**Figure S14.** SEC traces of “two step in one pot” copolymerization of a) PN<sub>s</sub>MAz<sub>20</sub>-OH and PN<sub>s</sub>MAz<sub>20</sub>-*b*-Poly(PO-*alt*-PA)<sub>20</sub> (Entry 4, Table 2); b) PN<sub>s</sub>MAz<sub>50</sub>-OH and PN<sub>s</sub>MAz<sub>50</sub>-*b*-Poly(PO-*alt*-PA)<sub>50</sub> (Entry 5, Table 2) c) PN<sub>s</sub>MAz<sub>100</sub>-OH and PN<sub>s</sub>MAz<sub>100</sub>-*b*-Poly(PO-*alt*-PA)<sub>100</sub> (Entry 6, Table 2) d) PN<sub>s</sub>MAz<sub>200</sub>-OH and PN<sub>s</sub>MAz<sub>200</sub>-*b*-Poly(PO-*alt*-PA)<sub>200</sub> (Entry 9, Table 2)



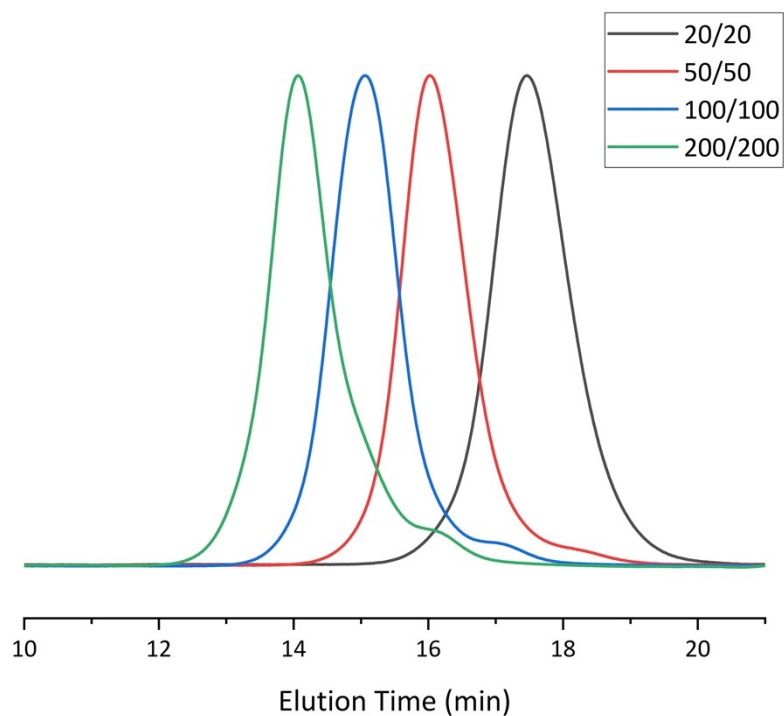

**Figure S15.** SEC traces of final copolymers PNMAz-*b*-Poly(PO-*alt*-PA) (Entries 4-6 and 9, Table 2);

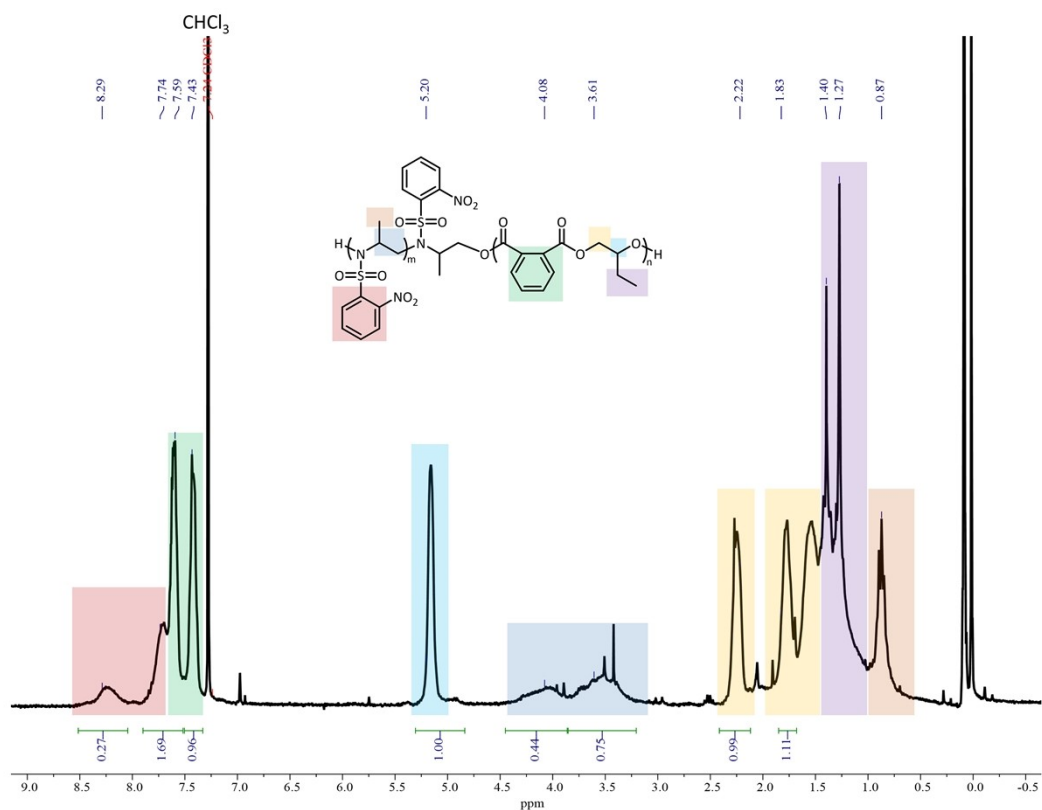

**Figure S16.** <sup>1</sup>H NMR spectrum of PNMAz-*b*-Poly(BO-*alt*-PA) (300 MHz, in CDCl<sub>3</sub> at 25 °C, Entry 13, Table 2).

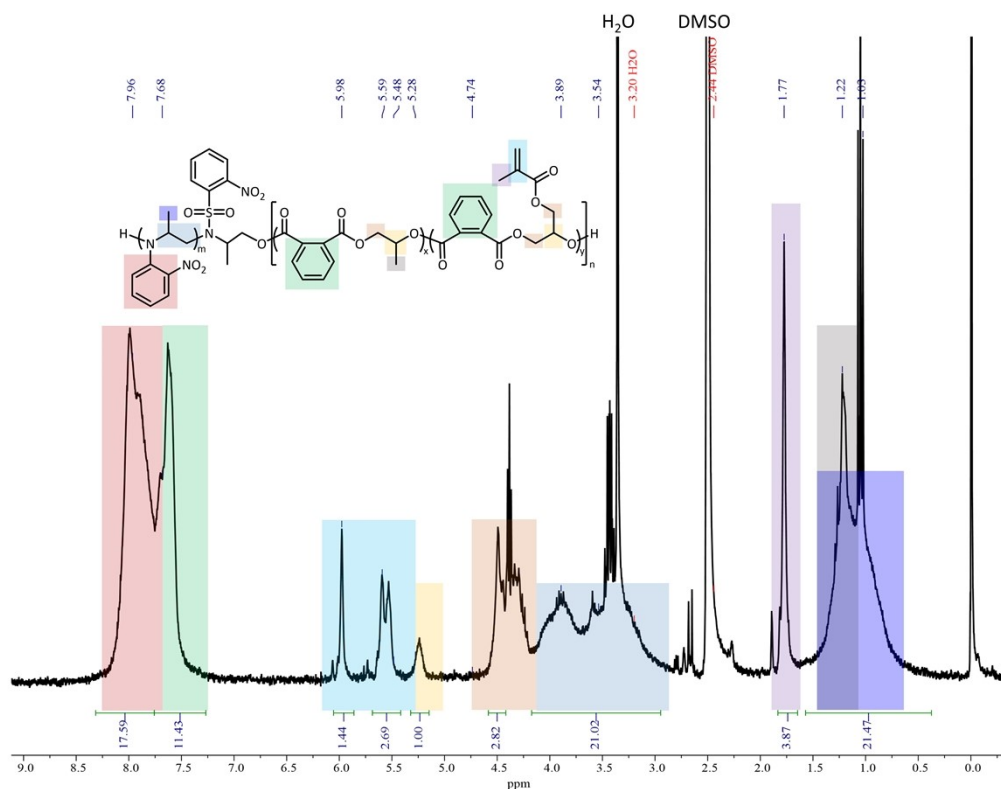

**Figure S17.**  $^1\text{H}$  NMR spectrum of PNsMAz-*b*-(Poly(GMA-*alt*-PA)-*co*-Poly(PO-*alt*-PA)) (300 MHz, in  $d^6\text{-DMSO}$  at 25 °C, Entry 14, Table 2).

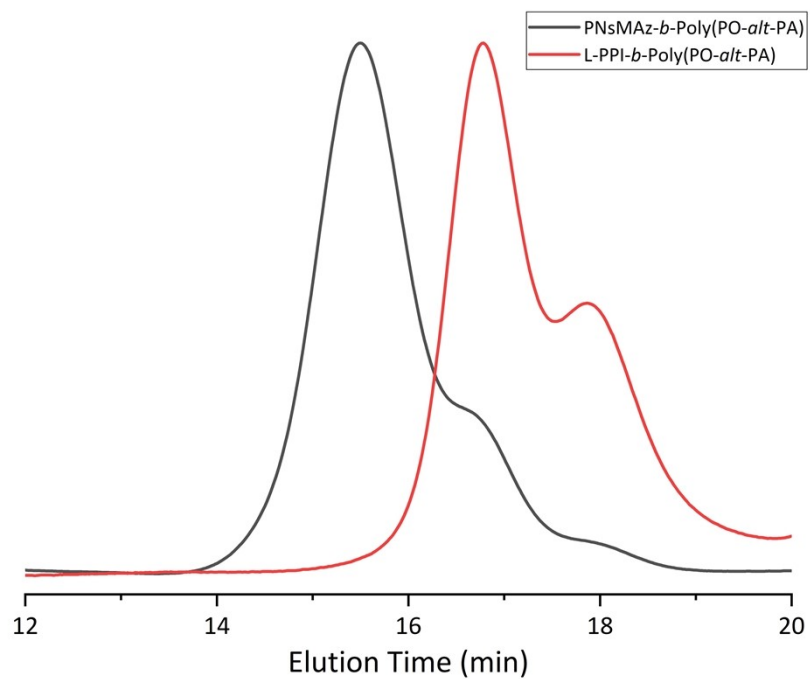

**Figure S18.** SEC traces of PNsMAz-*b*-Poly(PO-*alt*-PA) and L-PPI-*b*-Poly(PO-*alt*-PA)

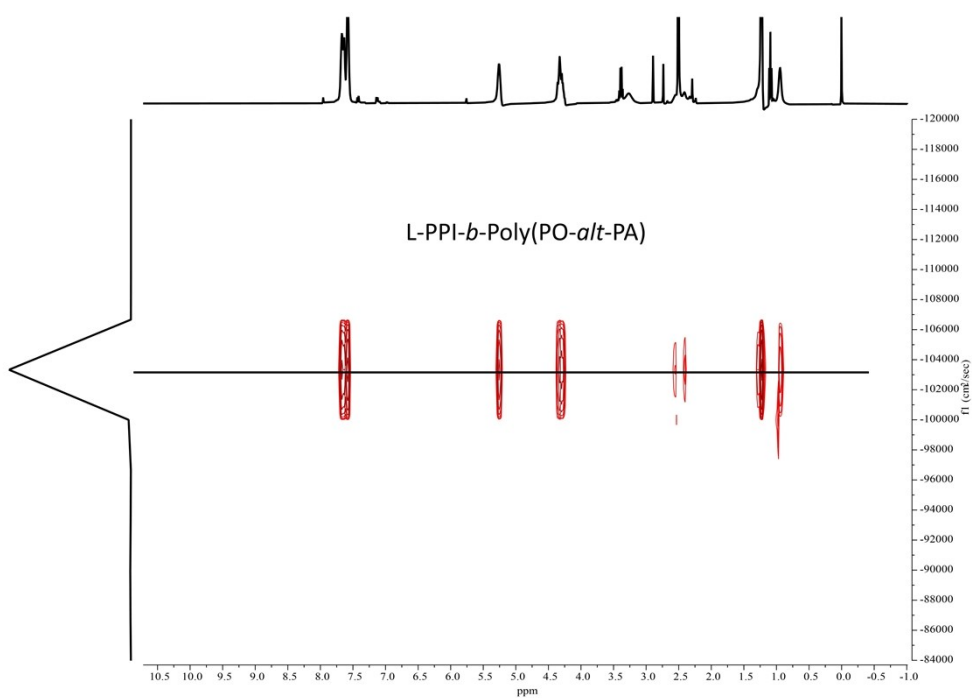

**Figure S19.** DOSY NMR spectrum of L-PPI-*b*-Poly(PO-*alt*-PA) (400 MHz, in  $d^6$ -DMSO).

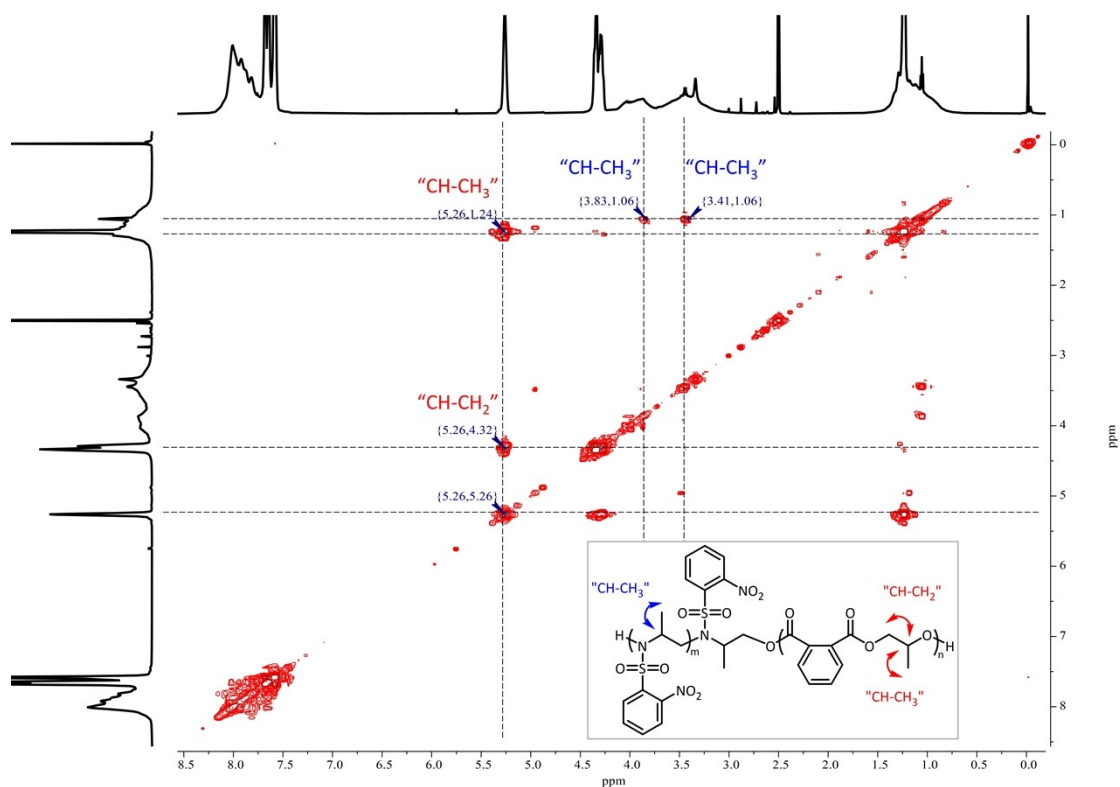

**Figure S20.**  $^1\text{H}$ - $^1\text{H}$  COSY spectrum of PNsMAz-*b*-Poly(PO-*alt*-PA) (600 MHz, in  $d^6$ -DMSO).

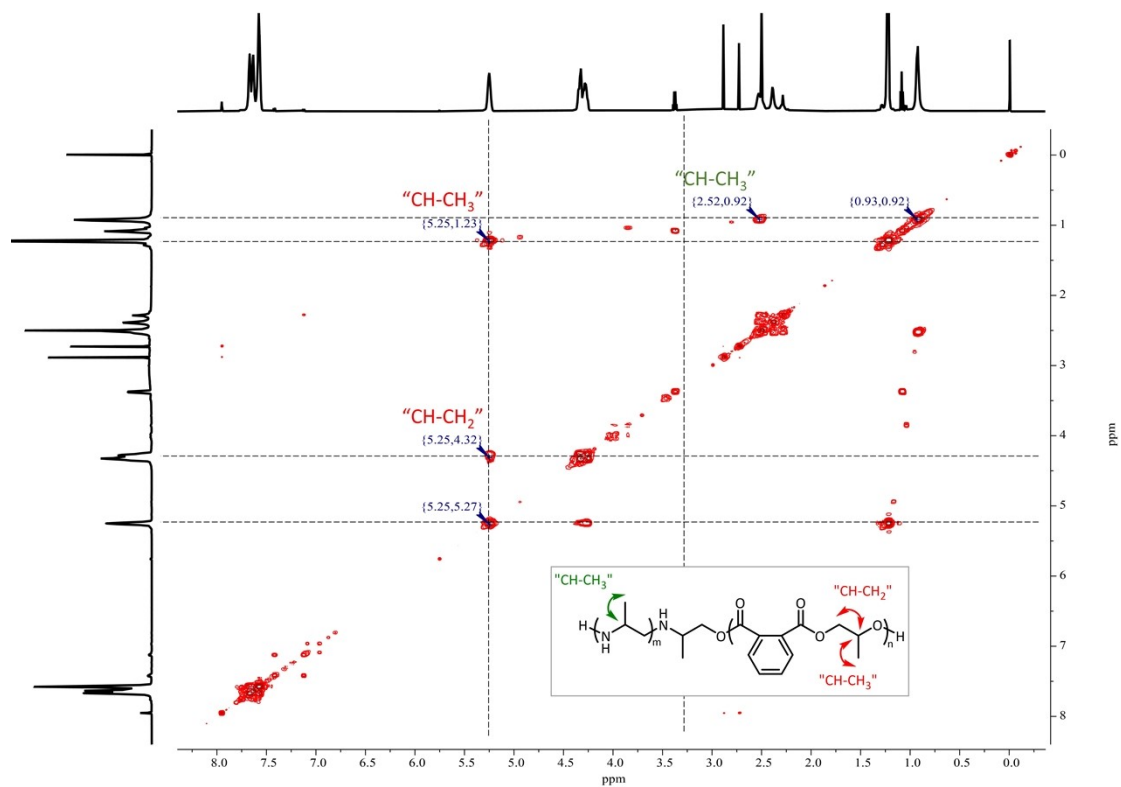

**Figure S21.**  $^1\text{H}$ - $^1\text{H}$  COSY spectrum of L-PPI-*b*-Poly(PO-*alt*-PA) (600 MHz, in  $d^6$ -DMSO).

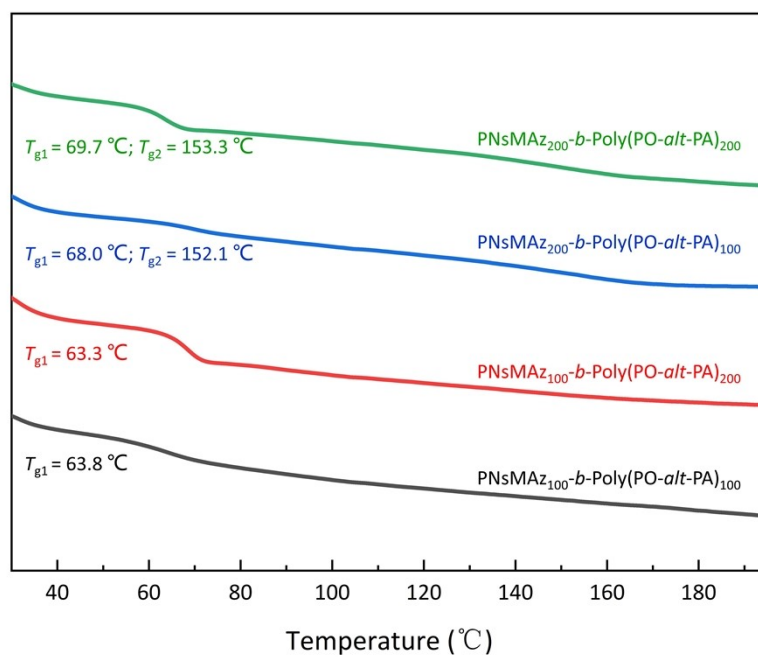

**Figure S22.** DSC traces of PNMAz-*b*-Poly(PO-*alt*-PA).

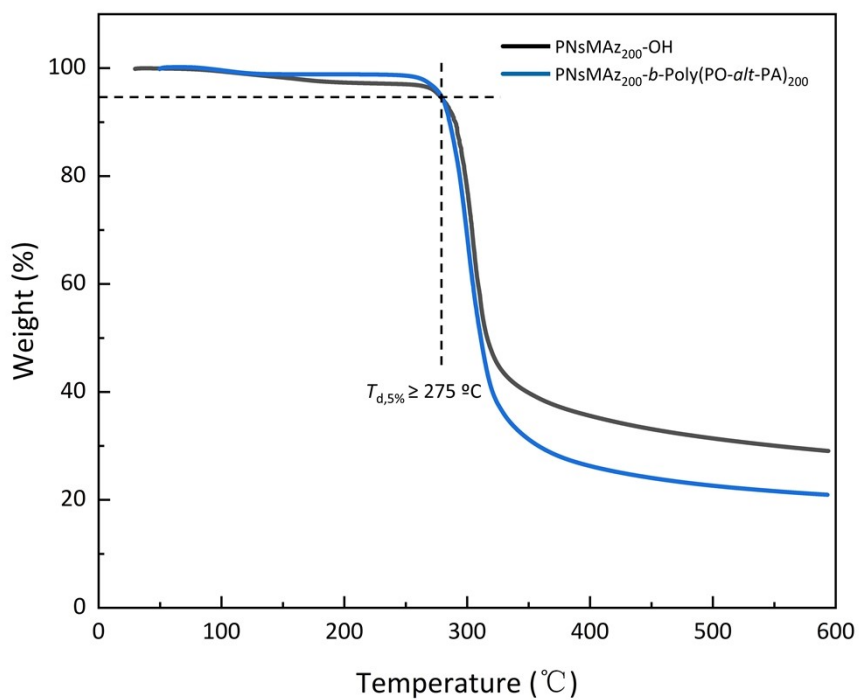

Figure S23. TGA traces of PN5MAz-OH and PN5MAz-*b*-Poly(PO-*alt*-PA).

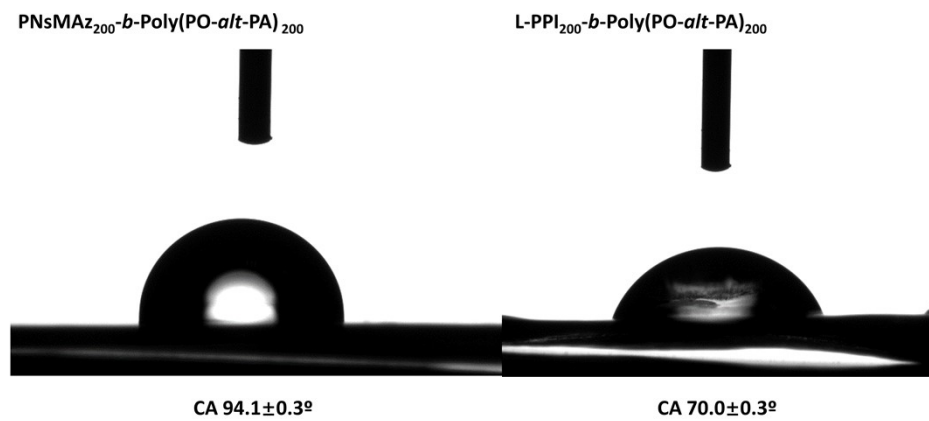

Figure S24. WCA tests of PN5MAz<sub>200</sub>-*b*-Poly(PO-*alt*-PA)<sub>200</sub> and L-PPI<sub>200</sub>-*b*-Poly(PO-*alt*-PA)<sub>200</sub>.
